# Supplementary material for: Use of Grape Peels By-Product for Wheat Pasta Manufacturing
Source: MDPI journal article supplement (doi:10.3390/plants10050926), 2021-05-06
Supplement: s1 [file s1]

# SUPPLEMENTARY MATERIAL

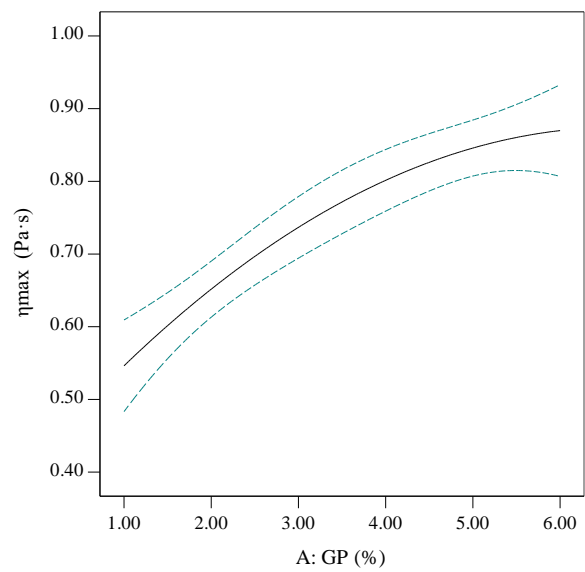

**Figure S1.** Effect of GP level on peak viscosity ( $\eta_{\max}$ )

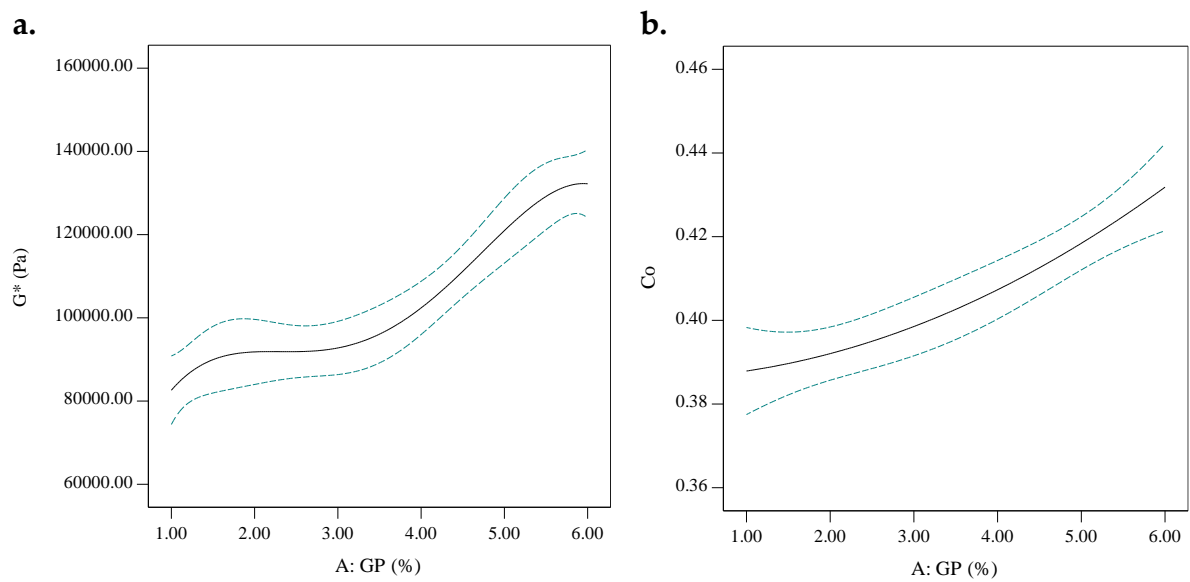

**Figure S2.** Effect of GP level on dough: a. complex modulus ( $G^*$ ), b. cohesiveness ( $Co$ )

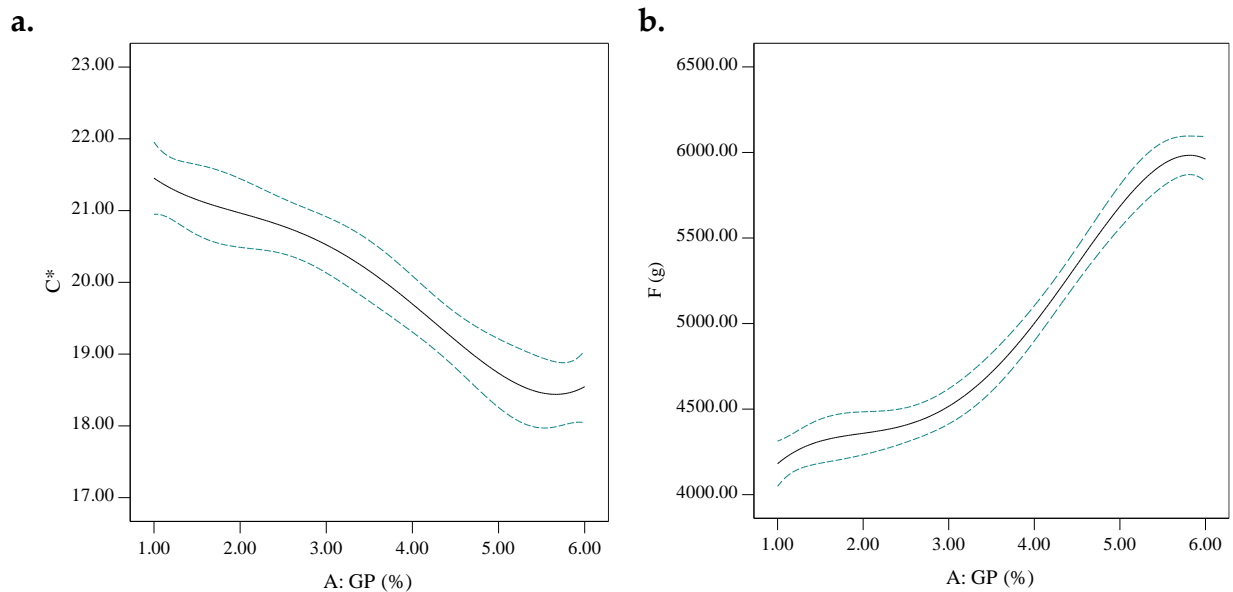

**Figure S3.** Effect of GP level on dry pasta: a. Chroma ( $C^*$ ), b. fracturability ( $F$ )

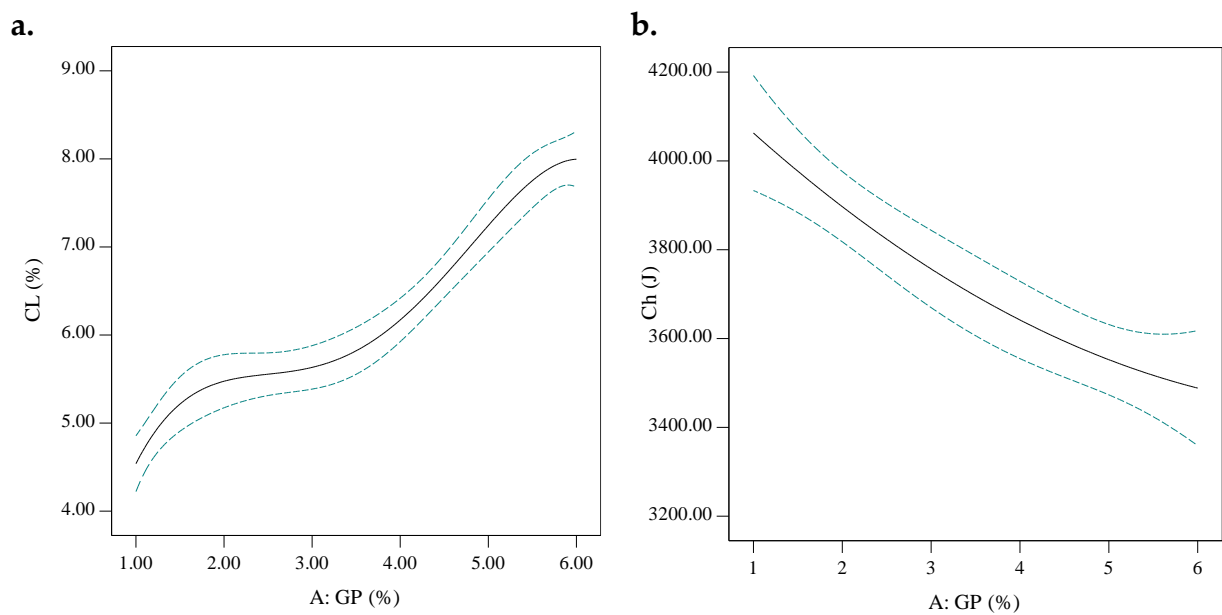

**Figure S4.** Effect of GP level on pasta: a. cooking loss ( $CL$ ), b. chewiness ( $Ch$ )

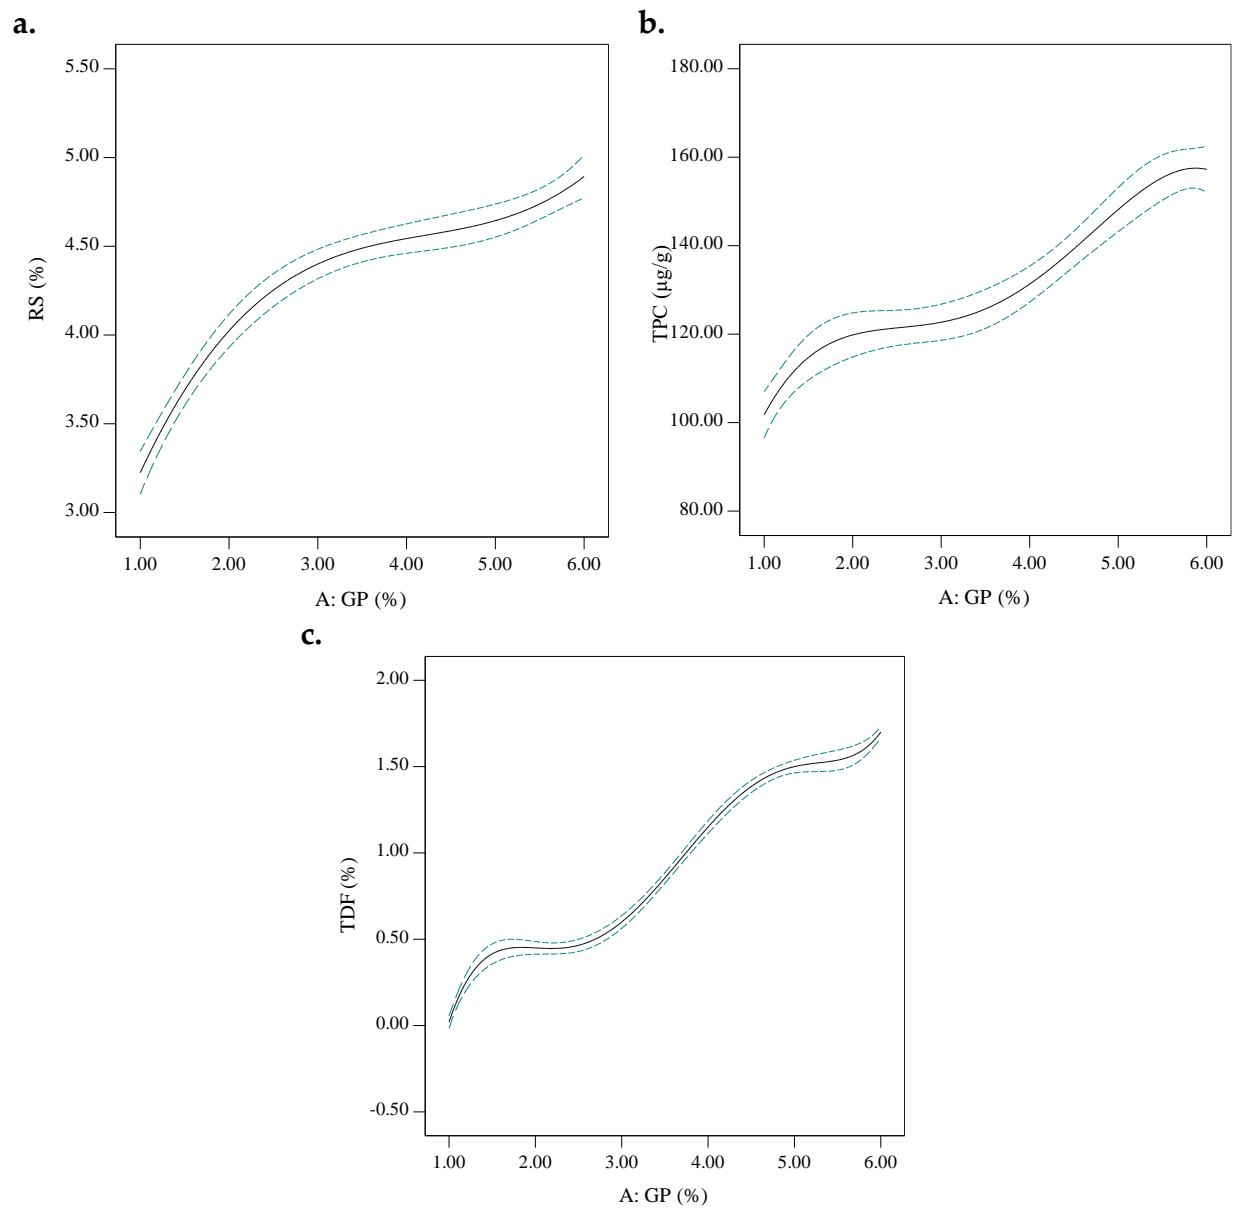

**Figure S5.** Effect of GP level on pasta: a. resistant starch content (RS), b. total polyphenols content (TPC), c. total dietary fiber (TDF)
